# Supplementary material
Source: PubMed Central journal article supplement (PMC5501978)
Supplement: ncomms9733-s1.pdf [file ncomms9733-s1.pdf]

# Supplementary Figures

Supplementary Figure 1

**a**

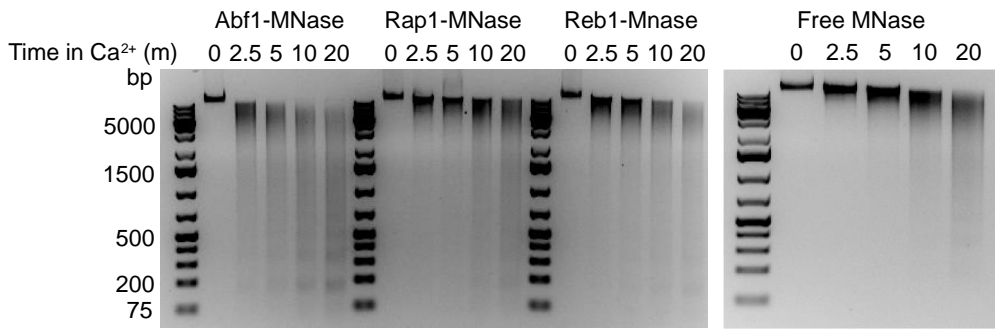

**b**

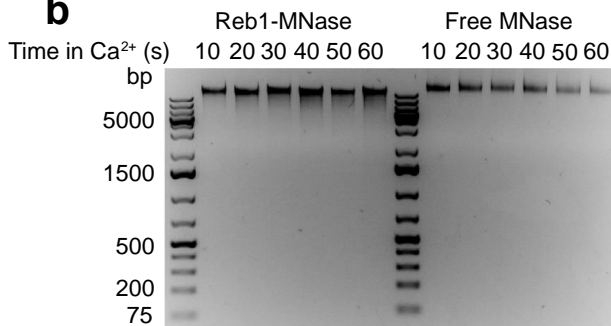

**c**

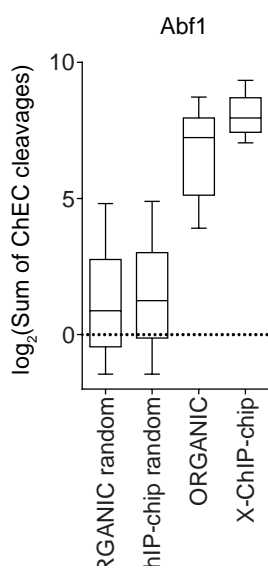

**d**

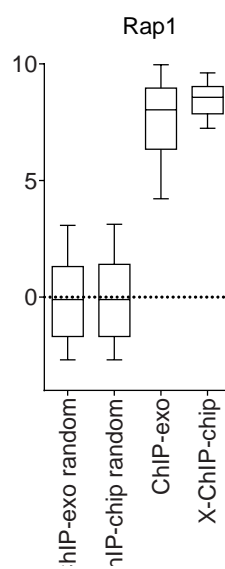

**e**

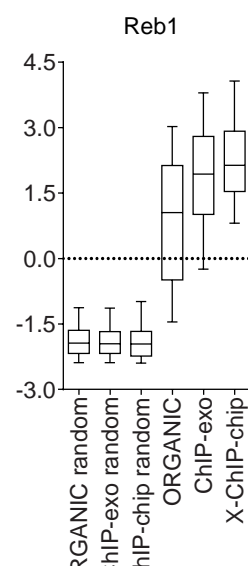

## Supplementary Figure 1. Specificity of ChEC-seq

(a) Agarose gel analysis of genomic DNA from TF-MNase and free MNase strains 0, 2.5, 5, 10, and 20 m after calcium addition. (b) Agarose gel analysis of genomic DNA from Reb1-MNase and free MNase strains 10, 20, 30, 40, 50, and 60 s after calcium addition. Also shown are boxplots of total ChEC-seq cleavages at peaks previously determined by various ChIP methods and an equal number of random sites for (c) Abf1, (d) Rap1, and (e) Reb1.

Supplementary Figure 2

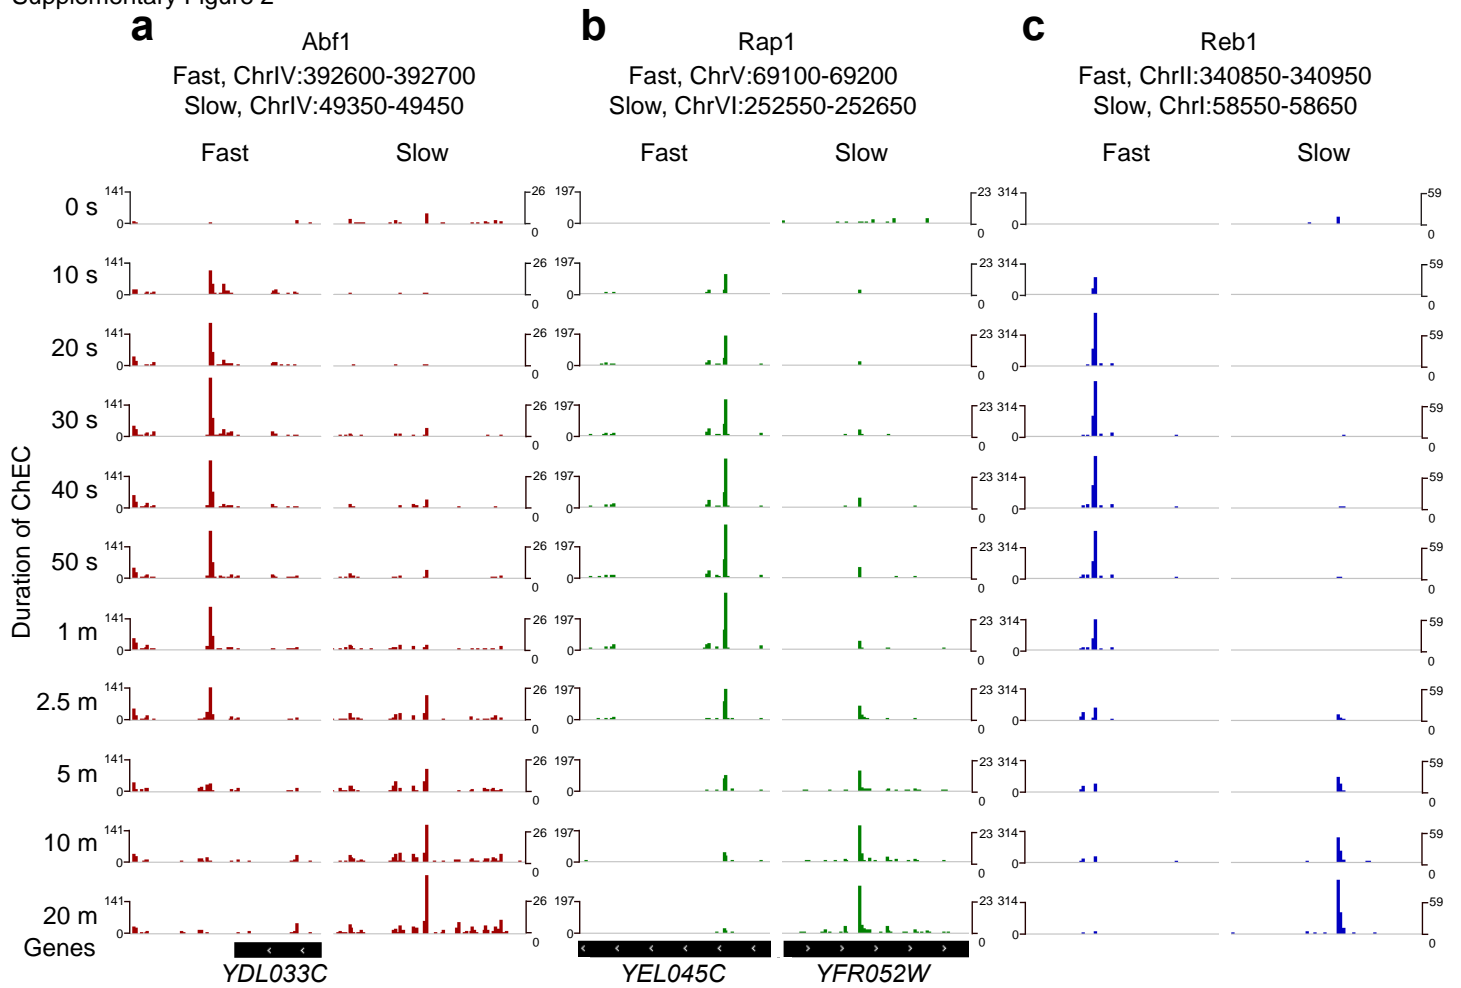

### Supplementary Figure 2. Fast and slow ChEC-seq sites

Tracks of ChEC-seq signal at a fast and slow site for (a) Abf1, (b) Rap1, and (c) Reb1.

Supplementary Figure 3

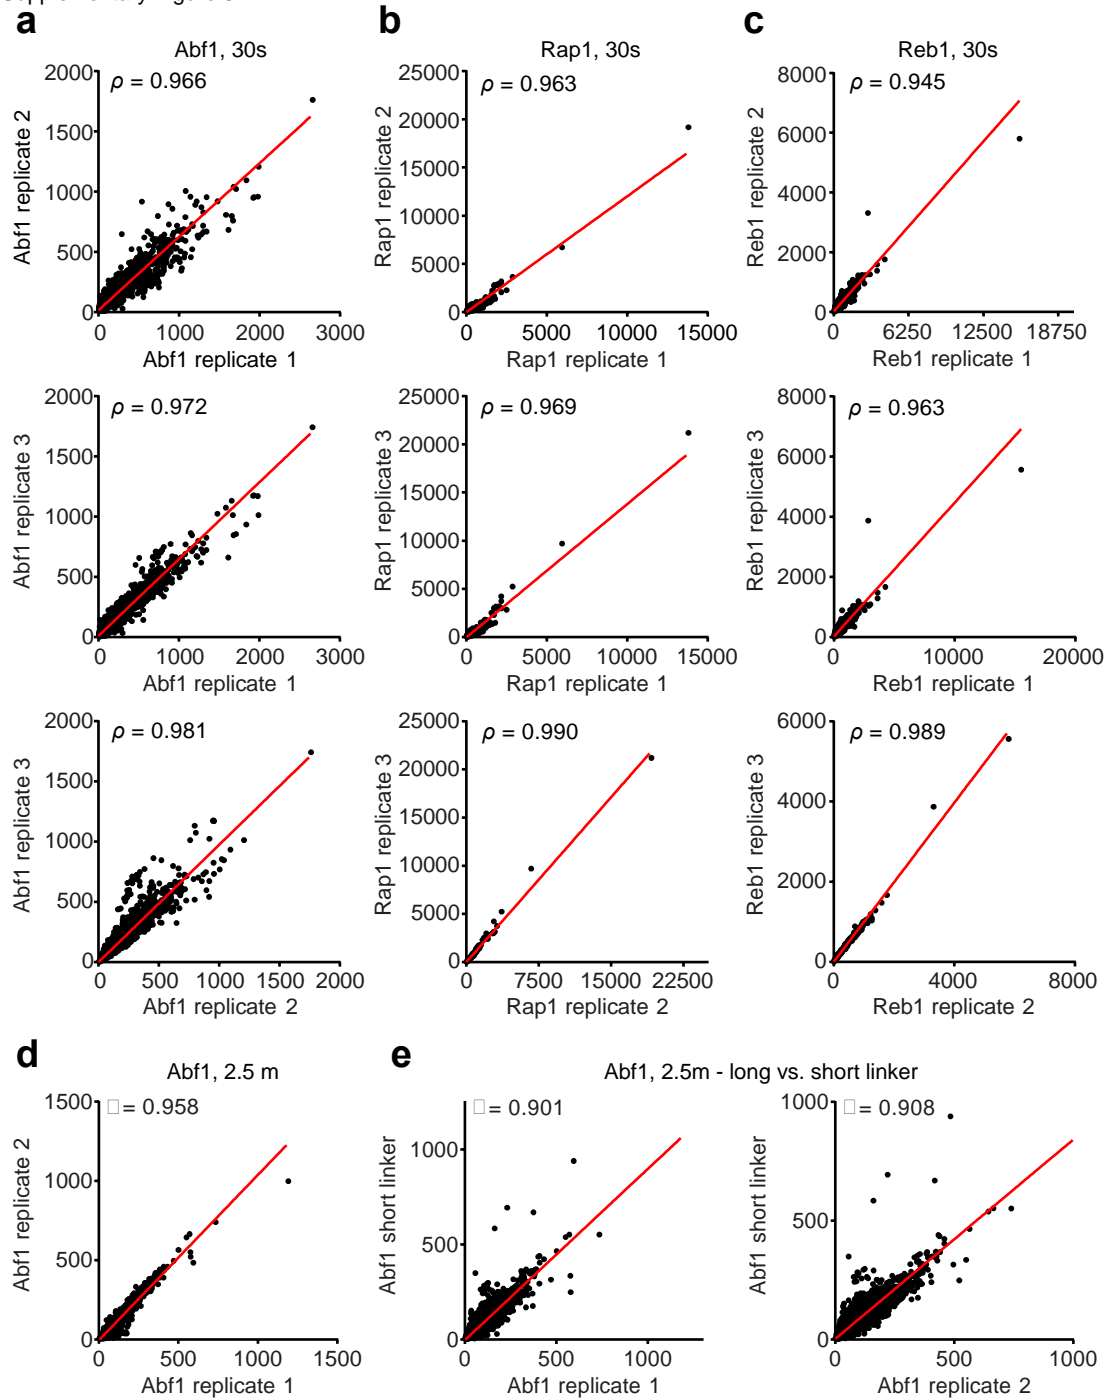

### Supplementary Figure 3. ChEC-seq peaks are highly reproducible

Pairwise correlations of 30 s ChEC-seq replicate signal at (a) Abf1, (b) Rap1, and (c) Reb1 peaks. (d) Pairwise correlation of 2.5 m ChEC-seq replicate signal. (e) Pairwise correlations of 2.5 m Abf1 ChEC-seq replicate signal with 2.5 m Abf1 short linker ChEC-seq signal. The sum of cleavages in a 50 bp window around each peak midpoint was taken to be that peak's occupancy. The Spearman's rank correlation coefficient  $\rho$  for each pairwise comparison is reported.

Supplementary Figure 4

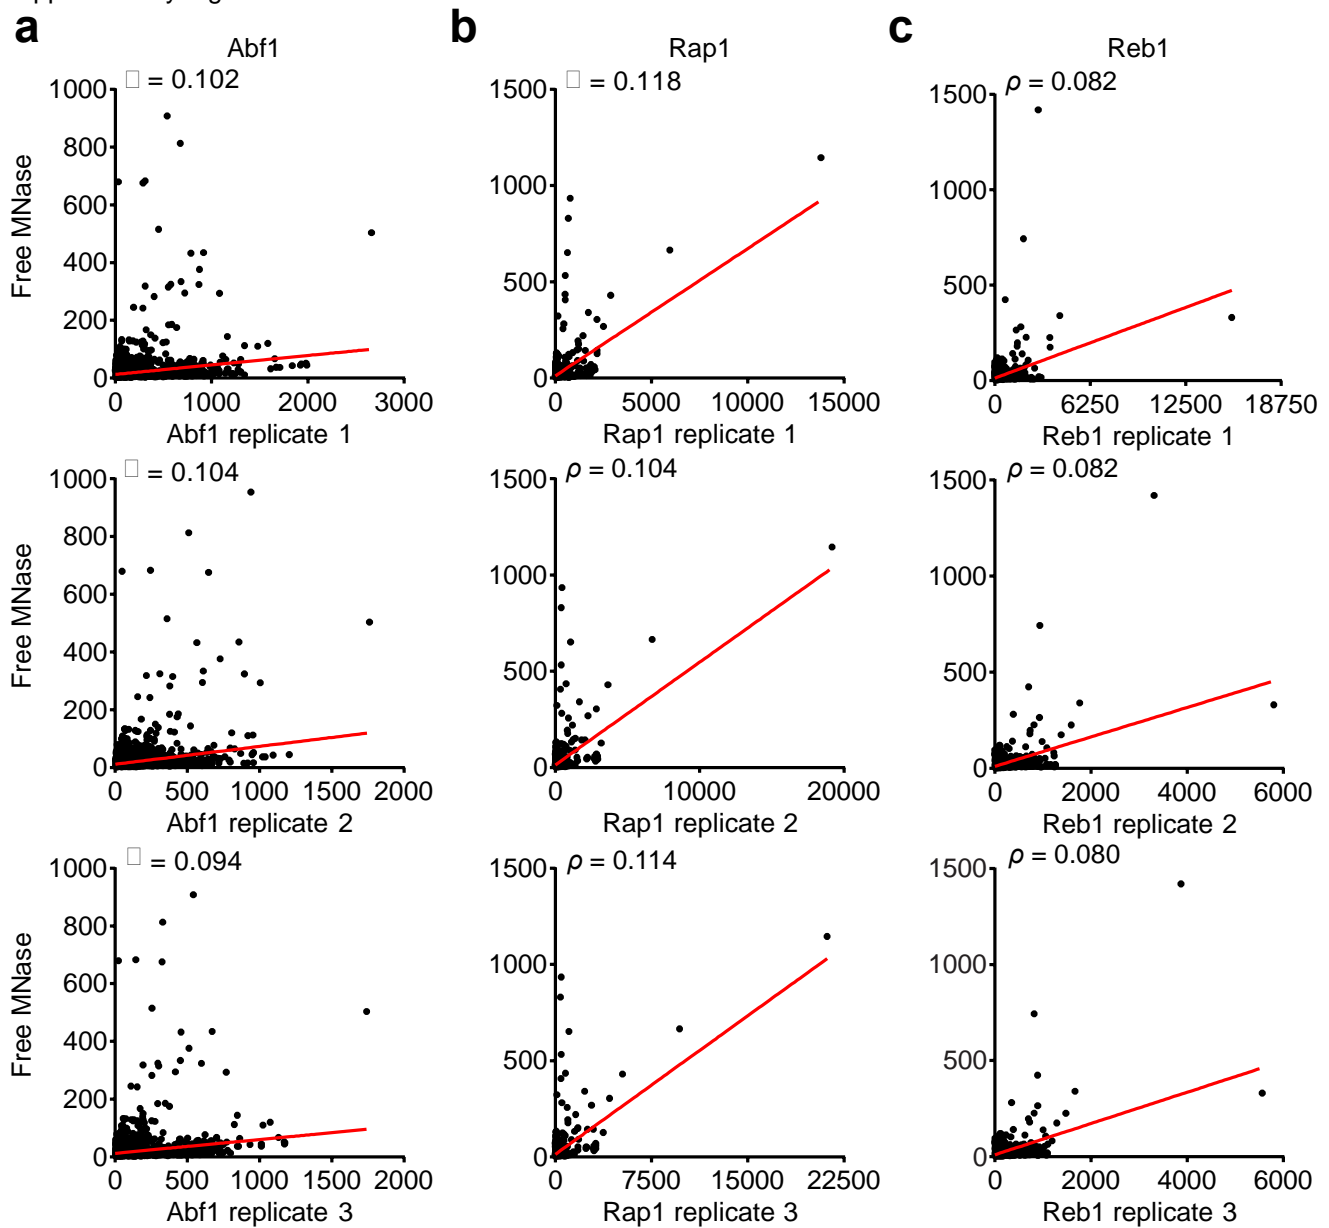

**Supplementary Figure 4. ChEC-seq peaks show poor correlation with free MNase signal**

Pairwise correlations of 30 s ChEC-seq and free MNase signal at (a) Abf1, (b) Rap1, and (c) Reb1 peaks. The sum of cleavages in a 50 bp window around each peak midpoint was taken to be that peak's occupancy. The Spearman's rank correlation coefficient  $\rho$  for each pairwise comparison is reported.

**a**

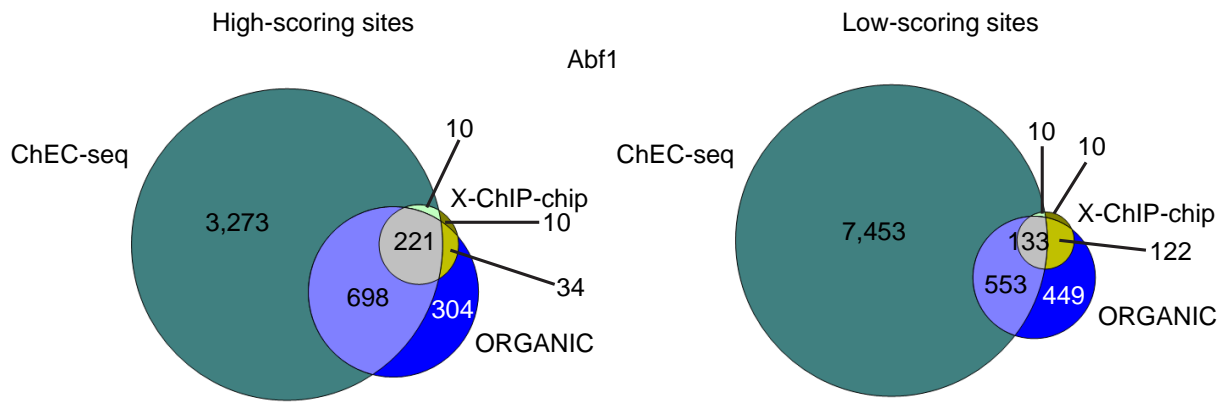

**b**

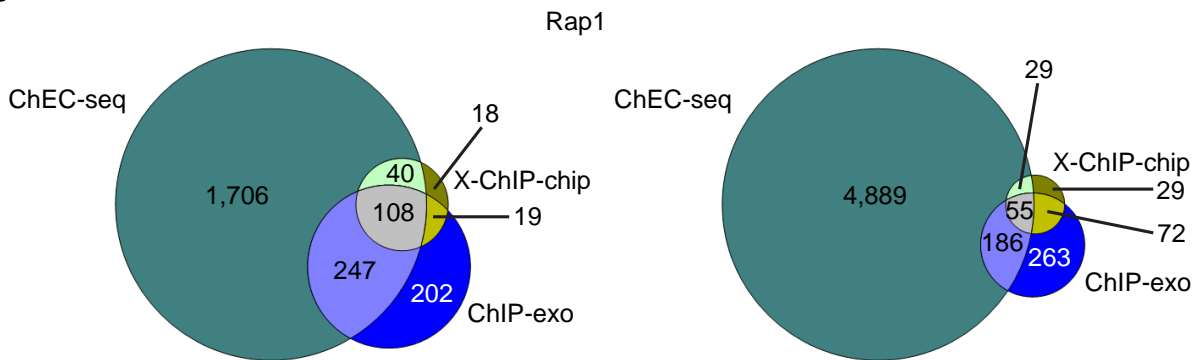

**c**

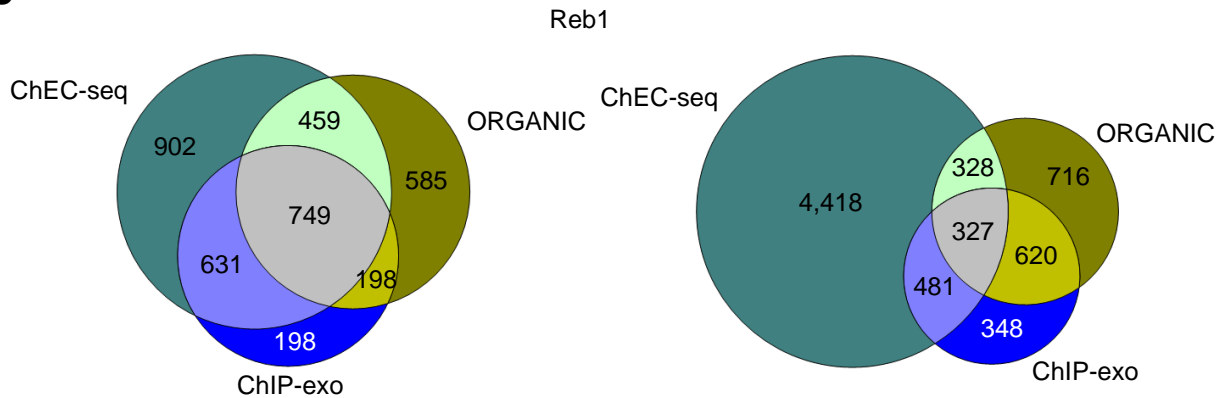

**Supplementary Figure 5. Overlap of ChEC-seq peaks with ChIP peaks**

(a) Venn diagrams of overlap between high- and low-scoring Abf1 ChEC-seq sites with Abf1 X-ChIP-chip and ORGANIC peaks. (b) Venn diagrams of overlap between high- and low-scoring Rap1 ChEC-seq sites with Rap1 X-ChIP-chip and ChIP-exo peaks. (c) Venn diagrams of overlap between high- and low-scoring Reb1 ChEC-seq sites with Reb1 ORGANIC and ChIP-exo peaks.

Supplementary Figure 6

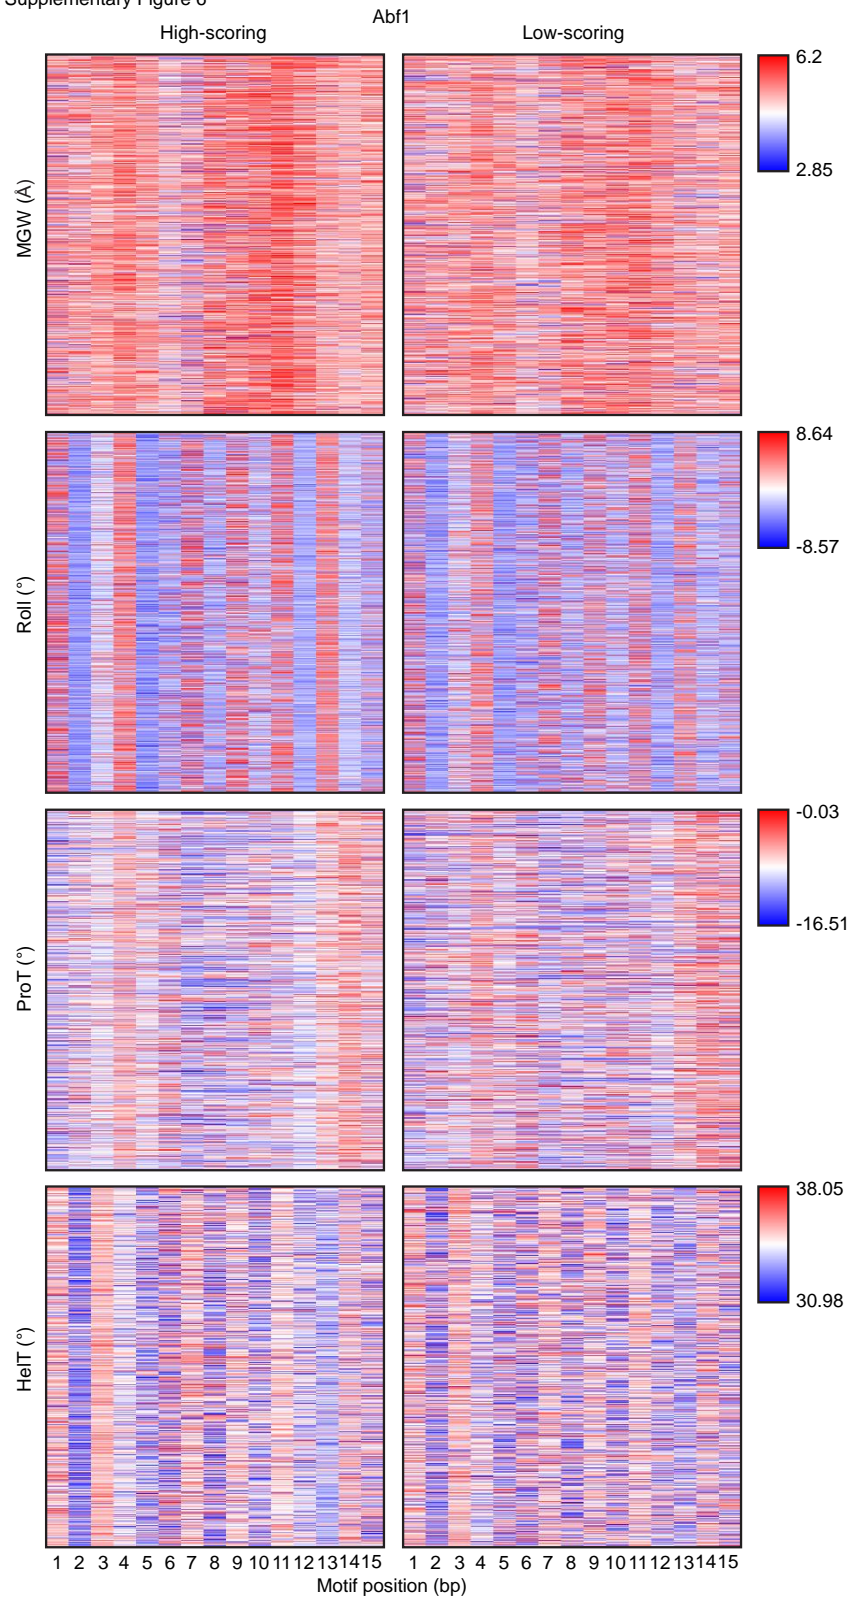

**Supplementary Figure 6. High-scoring and low-scoring Abf1 sites display similar shape profiles.**

Heatmaps of DNA shape features minor groove width (MGW), Roll, propeller twist (ProT), and helix twist (HeiT) around high- and low-scoring Abf1 sites ranked ascending by motif match  $p$ -values.

Supplementary Figure 7

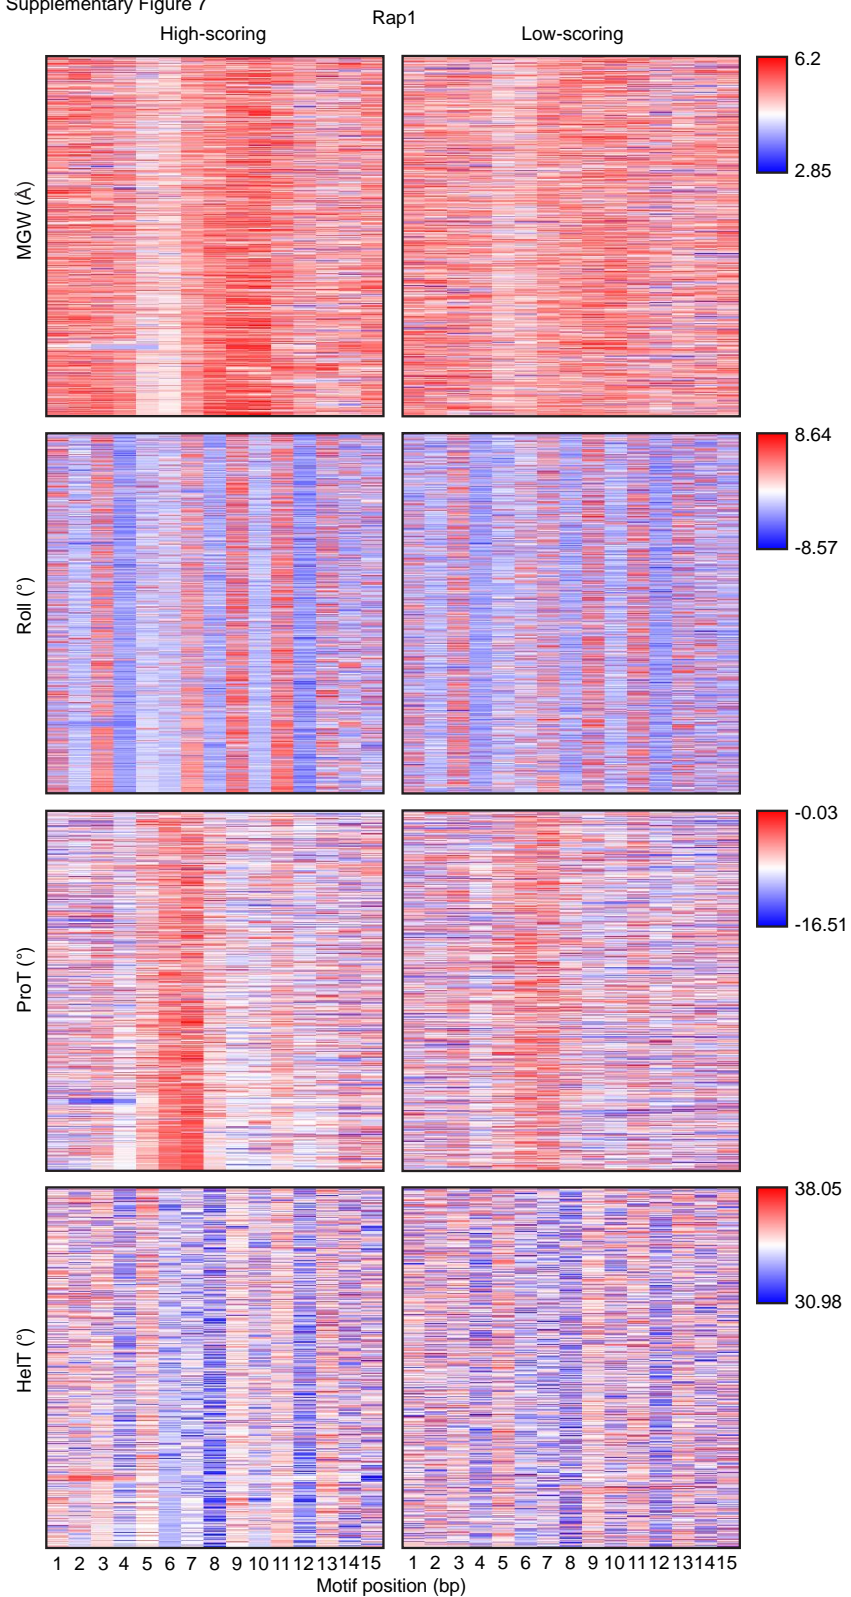

**Supplementary Figure 7. High-scoring and low-scoring Rap1 sites display similar shape profiles.** Heat maps of DNA shape features minor groove width (MGW), Roll, propeller twist (ProT), and helix twist (HeIT) around high- and low-scoring Rap1 sites ranked ascending by motif match  $p$ -values.

Supplementary Figure 8

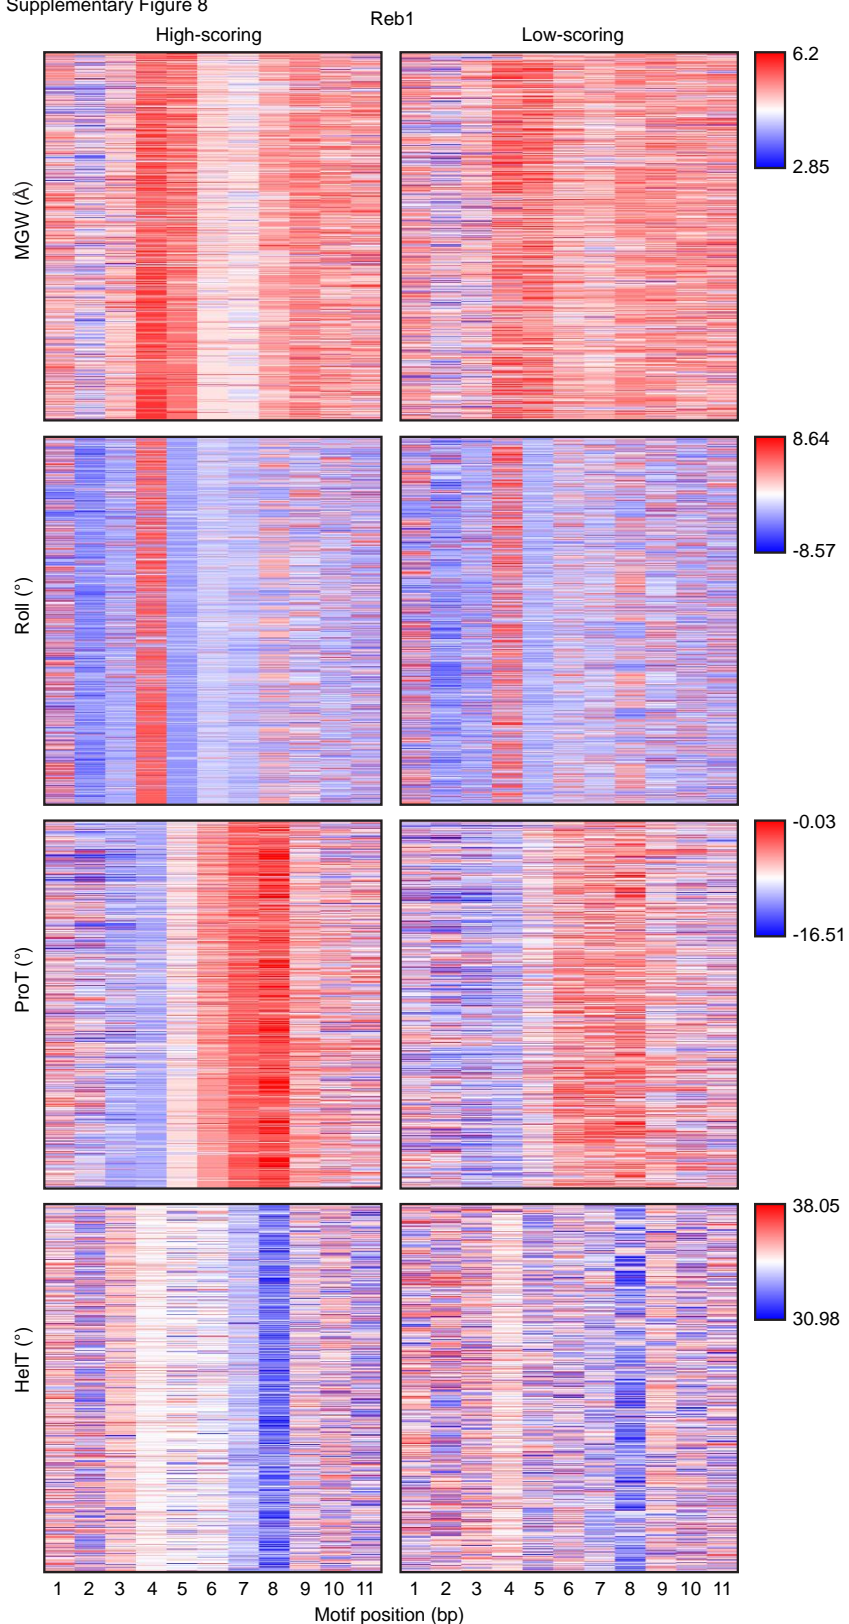

**Supplementary Figure 8. High-scoring and low-scoring Reb1 sites display similar shape profiles.** Heat maps of DNA shape features minor groove width (MGW), Roll, propeller twist (ProT), and helix twist (HeIT) around high- and low-scoring Reb1 sites ranked ascending by motif match  $p$ -values.



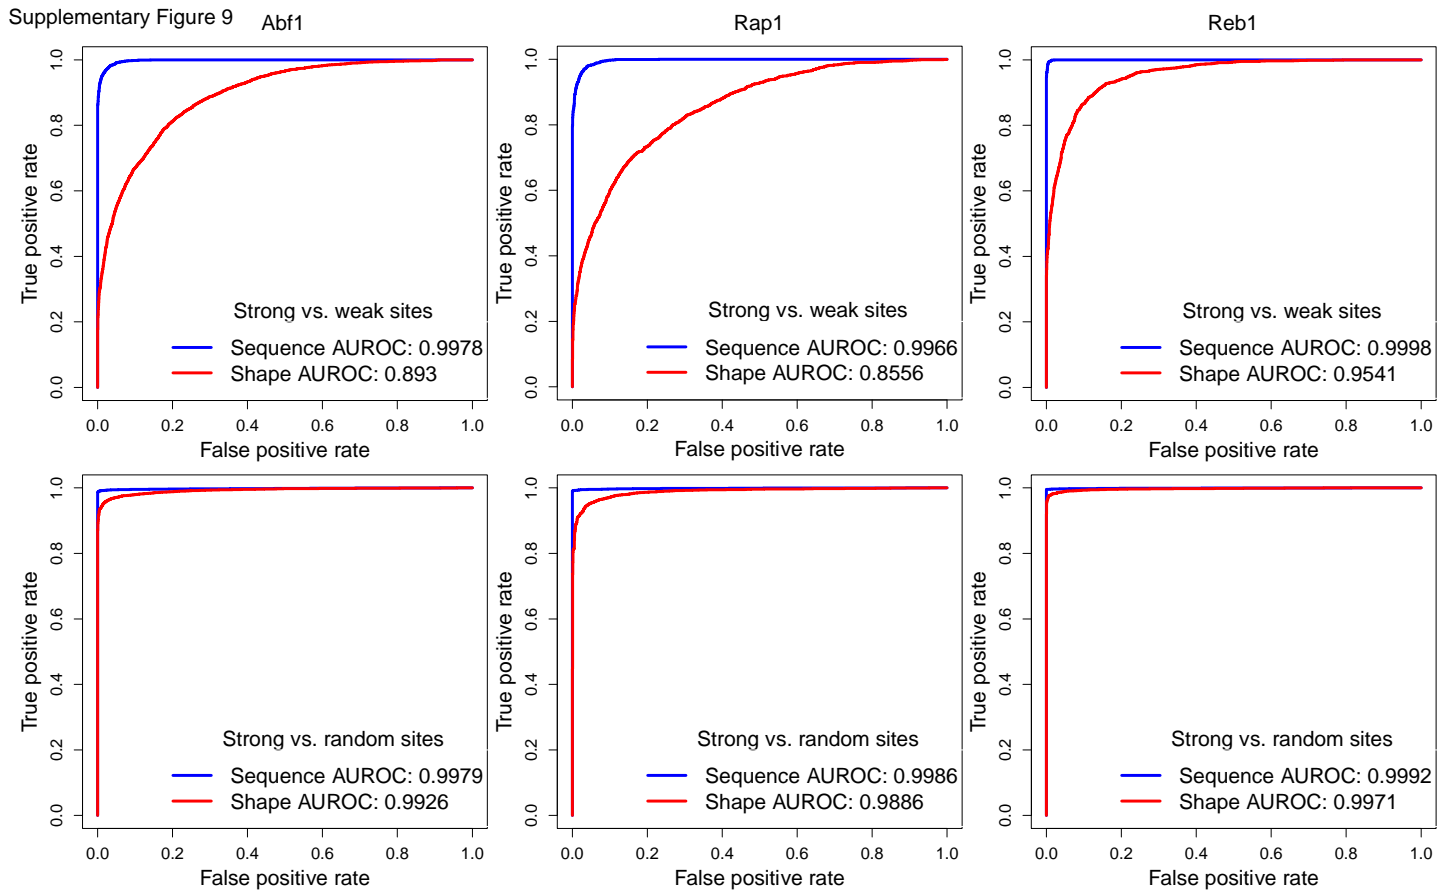

**Supplementary Figure 9. Classification of high-scoring and low-scoring motif sites using DNA sequence or shape.** Models based on L2-regularized multiple linear regression (MLR) encoding either sequence (blue) or shape (red) were used to distinguish sequences containing high-scoring and low-scoring motifs (top row) for Abf1 (left), Rap1 (center), and Reb1 (right). The lower AUROC values for the shape-based classification indicate the higher similarity of high-scoring and low-scoring sites in terms of DNA shape compared to sequence. This difference between sequence- and shape-based models cannot be observed when the MLR classification is applied to sequences containing high-scoring motifs and random sequences (bottom row).

## Supplementary Tables

| Plasmid           | Description                                                                   | Source           |
|-------------------|-------------------------------------------------------------------------------|------------------|
| pFA6a-3HA-KanMX6  | C-terminal 3xHA-tagging vector (F2/R1 compatible), kanMX6                     | Addgene          |
| pFA6a-3HA-HIS3MX6 | C-terminal 3xHA-tagging vector (F2/R1 compatible), HIS3MX6                    | Addgene          |
| pFA6a-3HA-TRP1    | C-terminal 3xHA-tagging vector (F2/R1 compatible), TRP1                       | Addgene          |
| pFA6a-kanMX6      | Deletion vector (F2/R1 compatible), kanMX6                                    | Sue Biggins      |
| pGZ108            | C-terminal 3xFLAG-MNase-tagging vector (F2/R1 compatible), kanMX6             | This study       |
| pGZ109            | C-terminal 3xFLAG-MNase-tagging vector (F2/R1 compatible), HIS3MX6            | This study       |
| pGZ110            | C-terminal 3xFLAG-MNase-tagging vector (F2/R1 compatible), TRP1               | This study       |
| pGZ136            | 3xFLAG-MNase-SV40 NLS under the control of the <i>REB1</i> promoter in pRS406 | This study       |
| pGZ172            | MNase-3FLAG-REB1 under the control of the <i>REB1</i> promoter in pRS413      | This study       |
| pGZ173            | C-terminal short linker-MNase-tagging vector (F2/R1 compatible), kanMX6       | This study       |
| pRS406            | Integrating vector, URA3                                                      | Toshio Tsukiyama |
| pRS413            | Shuttle vector, HIS3                                                          | Toshio Tsukiyama |

**Supplementary Table 1. Plasmids used in this study**

| <b>Strain</b> | <b>Genotype</b>                                                                                                                               | <b>Source</b>                         |
|---------------|-----------------------------------------------------------------------------------------------------------------------------------------------|---------------------------------------|
| GZY85         | <i>MATa ade2-1 can1-100 his3-11, 15 leu2-3, 112 trp1-1 ura3-1 RAD5+ REB1-3FLAG-MNase-kanMX6</i>                                               | This study                            |
| GZY98         | <i>MATa ade2-1 can1-100 his3-11, 15 leu2-3, 112 trp1-1 ura3-1 RAD5+ ura3::P<sub>REB1</sub>-3FLAG-MNase-URA3</i>                               | This study                            |
| GZY99         | <i>MATa ade2-1 can1-100 his3-11, 15 leu2-3, 112 trp1-1 ura3-1 RAD5+ ABF1-3FLAG-MNase-kanMX6</i>                                               | This study                            |
| GZY100        | <i>MATa ade2-1 can1-100 his3-11, 15 leu2-3, 112 trp1-1 ura3-1 RAD5+ RAP1-3FLAG-MNase-kanMX6</i>                                               | This study                            |
| GZY112        | <i>MATa ade2-1 can1-100 his3-11, 15 leu2-3, 112 trp1-1 ura3-1 RAD5+ ABF1-SL-MNase-kanMX6</i>                                                  | This study                            |
| GZY113        | <i>MATa ade2-1 can1-100 his3-11, 15 leu2-3, 112 trp1-1 ura3-1 RAD5+ RAP1-SL-MNase-kanMX6</i>                                                  | This study                            |
| GZY114        | <i>MATa ade2-1 can1-100 his3-11, 15 leu2-3, 112 trp1-1 ura3-1 RAD5+ REB1-SL-MNase-kanMX6</i>                                                  | This study                            |
| GZY115        | <i>MATa ade2-1 can1-100 his3-11, 15 leu2-3, 112 trp1-1 ura3-1 RAD5+ reb1Δ::kanMX6 pGZ172 (P<sub>REB1</sub>-MNase-3FLAG-REB1 HIS3 CEN ARS)</i> | This study                            |
| SKY1          | <i>MATa ade2-1 can1-100 his3-11, 15 leu2-3, 112 trp1-1 ura3-1 RAD5+ ABF1-3FLAG-kanMX4</i>                                                     | Kasinathan <i>et al.</i> <sup>1</sup> |

### **Supplementary Table 2. Yeast strains used in this study**

All strains were constructed in the W1588-4C background, which is isogenic to W303-1A except that a weak *rad5* mutation is repaired<sup>2</sup>.

## Supplementary References

1. Kasinathan, S., Orsi, G.A., Zentner, G.E., Ahmad, K. & Henikoff, S. High-resolution mapping of transcription factor binding sites on native chromatin. *Nat Meth* **11**, 203-209 (2014).
2. Zhao, X., Muller, E.G.D. & Rothstein, R. A Suppressor of Two Essential Checkpoint Genes Identifies a Novel Protein that Negatively Affects dNTP Pools. *Mol Cell* **2**, 329-340 (1998).
